# Supplementary material
Source: publisher figshare collection journal article supplement (https://gsajournals.figshare.com/ndownloader/files/13875371)
Supplement: Supplementary file 1 [file 13875371]

## Sheet: chr7_provean_summary
#Type	Total	Found_in_dbSNP	Not_found_in_dbSNP	PROVEAN_neutral	PROVEAN_deleterious	PROVEAN_NA
Protein_coding	328	316	12	317	8	3
Single_AA_Change	98	93	5	92	6	0
Synonymous	222	218	4	222	0	0
Deletion	2	2	0	1	1	0
Insertion	3	2	1	2	1	0
Multiple_AA_Change	0	0	0	0	0	0
Frameshift	2	0	2	0	0	2
Nonsense	1	1	0	0	0	1
Unknown	0	0	0	0	0	0
Input_error	0	0	0	0	0	0
Non_protein_coding	115189	107859	7330	0	0	115189
Input_format_error	0	0	0	0	0	0

## Sheet: chr7_provean_details
#ROW_NO.	INPUT	PROTEIN_ID	LENGTH	STRAND	CODON_CHANGE	POS	RESIDUE_REF	RESIDUE_ALT	TYPE	SCORE	PREDICTION (cutoff=-2.5)	GENE_ID	GENE_NAME
27276	7,58803778,C,G,rs32454569	ENSMUSP00000129811	1508	1	GAG A[C/G]G AAC	868	T	R	Single AA Change	-3.24	Deleterious	ENSMUSG00000025324	Atp10a
66802	7,64217710,G,T,rs51677782	ENSMUSP00000032737	443	1	TCT G[G/T]A CTG	403	G	V	Single AA Change	-2.87	Deleterious	ENSMUSG00000030523	Trpm1
89033	7,66386294,C,A,rs585868649	ENSMUSP00000103110	42	1	AGA GA[C/A] AGA	37	D	E	Single AA Change	-4	Deleterious	ENSMUSG00000078677	Gm10974
89034	7,66386302,C,G,rs580146963	ENSMUSP00000103110	42	1	GAG A[C/G]A GAG	40	T	R	Single AA Change	-6	Deleterious	ENSMUSG00000078677	Gm10974
89035	7,66386308,C,G,rs583399770	ENSMUSP00000103110	42	1	GAG A[C/G]A	42	T	R	Single AA Change	-6	Deleterious	ENSMUSG00000078677	Gm10974
96163	7,67735410,G,A,rs37590652	ENSMUSP00000073855	1561	-1	ACC [C/T]CA GAT	835	P	S	Single AA Change	-4.22	Deleterious	ENSMUSG00000030554	Synm
99760	7,49632536,TGCGCCG,T,rs246161289	ENSMUSP00000032717	335	-1	TCG C[CGGCGCA/A]C TCG	305	PA	.	Deletion	-3.51	Deleterious	ENSMUSG00000030507	Dbx1
114557	7,68226169,A,AGGAGCTGGAGAT,rs213031273	ENSMUSP00000005671	1369	1	CCA GA[-/GGAGCTGGAGAT]G GAG	1293	E	EELEM	Insertion	-3.22	Deleterious	ENSMUSG00000005533	Igf1r
63969	7,63919976,G,T,rs31348450	ENSMUSP00000136435	113	1	GAA [G/T]GA CAA	83	G	*	Nonsense	NA	NA	ENSMUSG00000095061	E030018B13Rik
109988	7,64217732,C,CA,rs258091982	ENSMUSP00000032737	443	1					Frameshift	NA	NA	ENSMUSG00000030523	Trpm1
113318	7,66365913,GTCTCTGTCTC,G,rs233655365	ENSMUSP00000103110	42	1					Frameshift	NA	NA	ENSMUSG00000078677	Gm10974

## Sheet: chr13_provean_summary
#Type	Total	Found_in_dbSNP	Not_found_in_dbSNP	PROVEAN_neutral	PROVEAN_deleterious	PROVEAN_NA
Protein_coding	726	721	5	684	38	4
Single_AA_Change	318	316	2	281	37	0
Synonymous	400	397	3	400	0	0
Deletion	2	2	0	1	1	0
Insertion	2	2	0	2	0	0
Multiple_AA_Change	0	0	0	0	0	0
Frameshift	3	3	0	0	0	3
Nonsense	1	1	0	0	0	1
Unknown	0	0	0	0	0	0
Input_error	0	0	0	0	0	0
Non_protein_coding	135585	128330	7255	0	0	135585
Input_format_error	3	0	3	0	0	3

## Sheet: chr13_provean_details
#ROW_NO.	INPUT	PROTEIN_ID	LENGTH	STRAND	CODON_CHANGE	POS	RESIDUE_REF	RESIDUE_ALT	TYPE	SCORE	PREDICTION (cutoff=-2.5)	GENE_ID	GENE_NAME
2056	13,69594938,T,G,.	ENSMUSP00000089097	255	-1	GGG GA[A/C] ACT	176	E	D	Single AA Change	-2.5	Deleterious	ENSMUSG00000021594	Srd5a1
8984	13,67139785,CAAA,C,rs235423729	ENSMUSP00000049650	721	1	GAA [CAAA/C]AA CCC	468	K	.	Deletion	-6.61	Deleterious	ENSMUSG00000057396	Zfp759
9218	13,67408273,C,CTGAG,rs254220150	ENSMUSP00000063027	267	-1					Frameshift	NA	NA	ENSMUSG00000055560	Zfp459
9636	13,67764553,GT,G,rs228050191	ENSMUSP00000125787	371	-1					Frameshift	NA	NA	ENSMUSG00000052909	Gm9894
9673	13,67792164,C,CT,rs241993926	ENSMUSP00000137936	110	1					Frameshift	NA	NA	ENSMUSG00000090659	Zfp493
10027	13,75913279,A,T,rs50624017	ENSMUSP00000105235	260	-1	AAT T[T/A]G AGC	249	L	*	Nonsense	NA	NA	ENSMUSG00000021589	Rhobtb3
12146	13,76135291,T,C,rs47265151	ENSMUSP00000089045	1563	1	GTG G[T/C]T GCA	834	V	A	Single AA Change	-3.38	Deleterious	ENSMUSG00000033991	Ttc37
14832	13,76384390,C,A,rs51387376	ENSMUSP00000096966	236	-1	TTC AG[G/T] CCA	213	R	S	Single AA Change	-6	Deleterious	ENSMUSG00000074798	Gm10760
18555	13,55013376,G,A,rs29533853	ENSMUSP00000051215	922	-1	GCG [C/T]GG CAC	254	R	W	Single AA Change	-4.2	Deleterious	ENSMUSG00000025877	Hk3
18583	13,55040584,T,C,rs13464883	ENSMUSP00000026997	727	-1	AGT G[A/G]C GGT	554	D	G	Single AA Change	-3.49	Deleterious	ENSMUSG00000025878	Uimc1
19849	13,56363027,C,A,rs29244708	ENSMUSP00000097075	142	1	ACG [C/A]GC CTA	43	R	S	Single AA Change	-3.5	Deleterious	ENSMUSG00000074885	Gm10782
36591	13,64793335,G,A,rs29241634	ENSMUSP00000089140	1287	-1	CAC T[C/T]T GTA	277	S	F	Single AA Change	-4.25	Deleterious	ENSMUSG00000033063	Cntnap3
37557	13,64922663,C,T,rs29230717	ENSMUSP00000097025	1014	1	TAT G[C/T]T TCA	875	A	V	Single AA Change	-2.64	Deleterious	ENSMUSG00000056223	Spata31
39696	13,65195090,T,C,rs30024628	ENSMUSP00000041908	937	-1	TGT G[A/G]T GAC	247	D	G	Single AA Change	-2.54	Deleterious	ENSMUSG00000032999	Nlrp4f
39944	13,65259947,C,T,rs29230989	ENSMUSP00000097022	127	1	TGG [C/T]TC TCA	21	L	F	Single AA Change	-4	Deleterious	ENSMUSG00000074847	Gm10775
39948	13,65260098,A,G,rs29229726	ENSMUSP00000097022	127	1	TGC A[A/G]T CTG	71	N	S	Single AA Change	-5	Deleterious	ENSMUSG00000074847	Gm10775
41240	13,66670863,T,G,.	ENSMUSP00000071284	270	-1	GGA G[A/C]G AAA	239	E	A	Single AA Change	-5.58	Deleterious	ENSMUSG00000074830	Zfp640
43752	13,67176535,G,A,rs48946877	ENSMUSP00000021997	485	1	AGG [G/A]AT GTG	42	D	N	Single AA Change	-3.13	Deleterious	ENSMUSG00000058900	Rsl1
44441	13,67256204,G,T,rs50239619	ENSMUSP00000047222	752	-1	AAG [C/A]CC TAC	724	P	T	Single AA Change	-2.85	Deleterious	ENSMUSG00000055480	Zfp458
44444	13,67256281,T,G,rs46115361	ENSMUSP00000047222	752	-1	TAC A[A/C]G TGT	698	K	T	Single AA Change	-3.36	Deleterious	ENSMUSG00000055480	Zfp458
44674	13,67292760,G,A,rs50565719	ENSMUSP00000053879	647	-1	AAA [C/T]CA TGC	584	P	S	Single AA Change	-5.54	Deleterious	ENSMUSG00000055341	Zfp457
44675	13,67292855,G,A,rs48769465	ENSMUSP00000053879	647	-1	CAT A[C/T]A GGA	552	T	I	Single AA Change	-4.24	Deleterious	ENSMUSG00000055341	Zfp457
44679	13,67293312,A,C,rs47098003	ENSMUSP00000053879	647	-1	GAC [T/G]AT CCA	400	Y	D	Single AA Change	-3.31	Deleterious	ENSMUSG00000055341	Zfp457
44681	13,67293432,G,T,rs50661409	ENSMUSP00000053879	647	-1	AAA [C/A]CA TAC	360	P	T	Single AA Change	-7.11	Deleterious	ENSMUSG00000055341	Zfp457
44686	13,67293662,C,T,rs51303756	ENSMUSP00000053879	647	-1	TGT G[G/A]C AAG	283	G	D	Single AA Change	-5.23	Deleterious	ENSMUSG00000055341	Zfp457
44687	13,67293685,C,A,rs213824742	ENSMUSP00000053879	647	-1	GAA AA[G/T] CCC	275	K	N	Single AA Change	-4.37	Deleterious	ENSMUSG00000055341	Zfp457
44689	13,67293746,C,T,rs49412468	ENSMUSP00000053879	647	-1	TGT G[G/A]C AAG	255	G	D	Single AA Change	-6.02	Deleterious	ENSMUSG00000055341	Zfp457
44690	13,67293769,C,A,rs50503832	ENSMUSP00000053879	647	-1	GAA AA[G/T] CCC	247	K	N	Single AA Change	-4.47	Deleterious	ENSMUSG00000055341	Zfp457
44698	13,67294062,A,G,rs49836738	ENSMUSP00000053879	647	-1	CCA [T/C]CA TTA	150	S	P	Single AA Change	-3.68	Deleterious	ENSMUSG00000055341	Zfp457
44700	13,67294184,T,C,rs49394604	ENSMUSP00000053879	647	-1	TCC T[A/G]C AAG	109	Y	C	Single AA Change	-4.27	Deleterious	ENSMUSG00000055341	Zfp457
45163	13,67390617,C,T,rs29231316	ENSMUSP00000105354	485	-1	GAA T[G/A]T GTC	236	C	Y	Single AA Change	-8.61	Deleterious	ENSMUSG00000078994	Zfp429
45684	13,67442297,C,T,rs46701153	ENSMUSP00000074735	447	-1	TGT [G/A]GG AAA	423	G	R	Single AA Change	-6.07	Deleterious	ENSMUSG00000069206	Zfp874a
47015	13,67591632,C,T,rs29228193	ENSMUSP00000012873	1045	-1	TGT G[G/A]G AAG	838	G	E	Single AA Change	-4.74	Deleterious	ENSMUSG00000058093	AA987161
47351	13,67619468,C,T,rs29512435	ENSMUSP00000012314	973	-1	TGT [G/A]GC AAA	881	G	S	Single AA Change	-3.04	Deleterious	ENSMUSG00000021510	A530054K11Rik
47355	13,67619668,G,A,rs29227940	ENSMUSP00000012314	973	-1	CAT A[C/T]A GGA	814	T	I	Single AA Change	-3.93	Deleterious	ENSMUSG00000021510	A530054K11Rik
47369	13,67621684,G,A,rs46956480	ENSMUSP00000012314	973	-1	CAT A[C/T]A GGA	142	T	I	Single AA Change	-3.5	Deleterious	ENSMUSG00000021510	A530054K11Rik
47417	13,67624050,T,G,rs47985477	ENSMUSP00000012314	973	-1	AGC [A/C]AC CTT	50	N	H	Single AA Change	-3.12	Deleterious	ENSMUSG00000021510	A530054K11Rik
47422	13,67624106,C,A,rs46026722	ENSMUSP00000012314	973	-1	GAA T[G/T]C CTG	31	C	F	Single AA Change	-6.58	Deleterious	ENSMUSG00000021510	A530054K11Rik
48294	13,67764806,G,A,rs49855915	ENSMUSP00000125787	371	-1	AAA C[C/T]C TAC	249	P	L	Single AA Change	-7.94	Deleterious	ENSMUSG00000052909	Gm9894
48295	13,67765329,T,C,rs46275780	ENSMUSP00000125787	371	-1	AAA C[A/G]C CAG	99	H	R	Single AA Change	-4.08	Deleterious	ENSMUSG00000052909	Gm9894
48579	13,67786861,G,A,rs3685708	ENSMUSP00000132282	384	1	TGT G[G/A]C AAA	311	G	D	Single AA Change	-5.04	Deleterious	ENSMUSG00000090659	Zfp493
49199	13,67833287,G,A,rs51633833	ENSMUSP00000051123	104	1	GAA T[G/A]C CTG	18	C	Y	Single AA Change	-7.88	Deleterious	ENSMUSG00000058246	Gm10037

## Sheet: chrX_provean_summary
#Type	Total	Found_in_dbSNP	Not_found_in_dbSNP	PROVEAN_neutral	PROVEAN_deleterious	PROVEAN_NA	SIFT_tolerated	SIFT_damaging	SIFT_NA
Protein_coding	47	44	3	40	3	4	33	8	6
Single_AA_Change	26	25	1	23	3	0	17	8	1
Synonymous	17	16	1	17	0	0	16	0	1
Deletion	0	0	0	0	0	0	0	0	0
Insertion	0	0	0	0	0	0	0	0	0
Multiple_AA_Change	0	0	0	0	0	0	0	0	0
Frameshift	3	2	1	0	0	3	0	0	3
Nonsense	1	1	0	0	0	1	0	0	1
Unknown	0	0	0	0	0	0	0	0	0
Input_error	0	0	0	0	0	0	0	0	0
Non_protein_coding	11744	10266	1478	0	0	11744	0	0	11744
Input_format_error	0	0	0	0	0	0	0	0	0

## Sheet: chrX_provean_details
#ROW_NO.	INPUT	PROTEIN_ID	LENGTH	STRAND	CODON_CHANGE	POS	RESIDUE_REF	RESIDUE_ALT	TYPE	SCORE	PREDICTION (cutoff=-2.5)	GENE_ID	GENE_NAME
6497	X,136529905,A,G,rs224049035	ENSMUSP00000108729	409	1	ATG [A/G]CC CTG	242	T	A	Single AA Change	-4.16	Deleterious	ENSMUSG00000031424	Kir3dl1
7055	X,136974223,T,G,rs29262768	ENSMUSP00000108694	45	-1	GAG AA[A/C] GAA	39	K	N	Single AA Change	-4.72	Deleterious	ENSMUSG00000089768	Tmsb15b1
7932	X,139236351,T,C,.	ENSMUSP00000108664	681	1	ATT G[T/C]C AAT	546	V	A	Single AA Change	-3.84	Deleterious	ENSMUSG00000042515	Mum1l1
6505	X,136533970,T,G,rs29264203	ENSMUSP00000108729	409	1	GGG T[T/G]A CAT	396	L	*	Nonsense	NA	NA	ENSMUSG00000031424	Kir3dl1
11223	X,136533966,G,GA,rs257011535	ENSMUSP00000108729	409	1					Frameshift	NA	NA	ENSMUSG00000031424	Kir3dl1
11305	X,136742187,T,TGTGTGTGTGCGCGC,rs229298167	ENSMUSP00000086765	141	1					Frameshift	NA	NA	ENSMUSG00000072960	BC065397
11306	X,136742379,T,TTTTG,rs244048438	ENSMUSP00000086765	141	1					Frameshift	NA	NA	ENSMUSG00000072960	BC065397
